# Supplementary material
Source: Research Square preprint supplement (doi:10.21203/rs.3.rs-9800090/v1)
Supplement: Supplementary file 1 [file e1ad8d4dcc89888a9027dac5.docx]

**Interview guide**

**Awareness and Attitudes Toward mHealth Applications Among Public Health Students in kingdom of Saudi Arabia**

**Approval No. (HAPO-02-K-012-2025-11-3019)**

**Introduction**

- Welcome and thank the participant.
- Introduce yourself and your research.
- Brief overview of the study and its purpose.
- Explain interview format and confidentiality.
- Obtain verbal or written informed consent.
- Ask for permission to record the interview.

We do not expect this research will cause any harms or discomfort. However, if you feel any inconvenience while participating in this research, you have the complete right to stop participating without giving any reason.

**Study Overview**

Mobile health (mHealth) refers to the use of mobile technologies, such as smartphones, tablets, and wearable devices, to support healthcare delivery and public health activities. It includes applications for health monitoring, chronic disease management, appointment scheduling, and health promotion. As a key component of digital health transformation aligned with Saudi Vision 2030, mHealth enhances healthcare accessibility, efficiency, and patient engagement. This study aims to assess public health students’ awareness, attitudes, and willingness to use mHealth applications in Saudi Arabia, identify perceived benefits and barriers, and provide recommendations to strengthen digital health education.

**Demographic Information:**

**1- Age Group:**

☐ 18–24 years

☐ 25–30 years

☐ 31 years and above

**2- Gender:**

☐ Male

☐ Female

**3- Region of Residence:**

☐ Central

☐ Western

☐ Eastern

☐ Northern

☐ Southern

**4- Public health specialists:**

☐ Awareness and promotion

☐ Health informatics

☐ Public health

☐ Hospital management

☐ Occupational Health

☐ Epidemiology

☐ Other: ……

**5- University name:**

…………

**6- Year:**

☐ Second year

☐ Third year

☐ Fourth year

☐ Internship year

**Interview Questions**

1. What comes to your mind when you hear the term “mobile health applications” or mHealth? Explain?
2. In your opinion, what are the most common uses of mHealth applications in Saudi Arabia?
3. Have you used any mHealth applications? How? If not:
   1. Can you explain why not?
4. Do you think universities should integrate mHealth tools or topics into public health education? Explain why?
5. What factors do you think encourage students to use mHealth applications?
6. In your opinion, what are the main benefits of using mobile health apps for students in the public health field? Explain?
7. What challenges or barriers might prevent students from using these applications? Explain?
8. How do you think mHealth could contribute to improving healthcare services or public health awareness in Saudi Arabia in the future?
9. Is there anything else you would like to add about mHealth in healthcare?

Thank the participant and end the interview.
